# Supplementary material
Source: publisher site journal article supplement (https://www.dovepress.com/article/476348)
Supplement: Supplementary file 1 [file get_supplementary_file.php]

**Supplementary data**

**Collection of risk markers and estimation of prodromal PD**

Specifically, data on age, sex, cigarette smoking, use of tea, regular pesticide exposure, and family history of PD was obtained by standard questionnaires administered by trained staff. Using the key questions from the Global Adult Tobacco Survey (GATS), 1 smoking status was classified as current, former, and never smoking. Current smoking was defined as having smoked at least 100 cigarettes in the subject’s entire life, having smoked cigarettes regularly, and smoking currently. Former smoking was defined as having smoked at least 100 cigarettes in the subject’s entire life, having smoked cigarettes regularly in the past, and not smoking currently. Never smoking was defined as never smoked or having smoked fewer than 100 cigarettes in their lifetime. Alcohol consumption was similarly classified as current, former, and never drinking. Current drinking was defined as having consumed alcohol ≥ 12 times in the past year and drinking currently, former drinking was defined as having stopped drinking alcohol for at least 12 months, and never drinking was defined as never drinking alcohol in their lifetime. Condition for constipation was assessed by using the validated Wexner scoring system and a score ≥15 was considered as constipation, as previously recommended by Agachan et al. 2 The Wexner scores range from 0 to 30 points, where a lower score indicates a lower level of constipation symptoms. RBD was assessed by the RBD screening questionnaire (RBDSQ) which is a validated 10-item, self-rating instrument, for assessing the subject's sleep behavior, 3 and it has been translated into various languages, including Chinese. 4 Participants with a score >6 were considered as having probable RBD. Depressive symptoms were assessed using the Center for Epidemiologic Studies Depression Scale (CES-D), which is a 20-item, self-reported scale designed to measure depressive symptomatology in the general population. 5 CES-D score ≥20 was defined as depression 6. Olfactory dysfunction was determined using the modified Brief Smell Identification Test for Chinese (B-SITC) purchased from Jiangsu Parkinsense Biotech Co. Ltd. and used following the manufacturer’s instructions. The B-SITC is a portable, card-like odor-dispensing device dedicated to the fast and convenient screening of olfaction and has been validated in the Chinese population with high sensitivity and specificity. 7 The test was performed in a well-ventilated room by trained staff. The B-SITC had 12 odors including banana, apple, aniseed, rose, pineapple, lemon, yogurt, mint, resin, camphor, wood, and garlic. A pre-sealed odor pack was presented 3-5 cm in front of the nose for a few seconds and individuals were then asked to choose one of the four available odor choices (1 point for each correct test, with a full point of 12). The test interval between each odor should not exceed 15 sec and the total test time was limited to 5 min. Individuals who scored <8 points were considered as having olfactory dysfunction. 7 Using a transducer (Sequoia 512, Siemens, USA) with an emitting frequency of 2.5 MHz, a dynamic range of 45 to 55 dB, and penetration depth of 14 to 16 cm, transcranial sonography (TCS) was performed by an experienced ultrasonographer through the temporal acoustic window in the orbitomeatal line. Image brightness and time-gain compensation were adapted for the best visualization. Substantia nigra (SN) was found in the mesencephalic brainstem plane, as previously described. 8 The area of the SN was manually encircled with the cursor and automatically calculated. We defined hyperechogenic SN (SN+) as the area of either left or right SN equal to or greater than 0.20 cm2. 9

**Measurement of covariates**

Education level was recorded as the number of years a person stayed in the education system by a self-reported questionnaire. Physical activity was determined using the Global Physical Activity Questionnaire (GPAQ), which the WHO developed for physical activity surveillance in developing countries. 10 The GPAQ includes information on physical activity at work, commuting, recreational activities, and sedentary behavior. The measured data were processed according to the GPAQ Analysis Guide, and MET-minutes per week values were calculated to quantify the levels of physical activity. Body weight and height were measured using a regularly calibrated stadiometer and balance-beam scale with participants wearing light clothing and no shoes. Body mass index (BMI) was calculated as weight in kilograms divided by height in meters squared. Three consecutive sitting blood pressure (BP) measurements (with 30 sec in-between) on two different days were taken by trained staff using a digital BP measuring device (HBP-1320, Omron, Japan), after the subjects had been resting for at least 5 min. All participants were required to avoid exercise, smoking, drinking alcohol, and tea for at least 30 min before the measurement. The means of the three measurements were recorded as the systolic and diastolic BP levels. Hypertension was defined as systolic BP ≥ 140 mmHg or diastolic BP ≥ 90 mmHg or receiving antihypertensive medications. Blood samples were collected in the morning after overnight fasting for at least 8 hours and transfused into vacuum tubes containing EDTA (Ethylene Diamine Tetra Acetic acid). Plasma fasting glucose, total cholesterol, triglycerides, high-density lipoprotein cholesterol (HDL-C), and low-density lipoprotein cholesterol (LDL-C) were immediately measured by the auto analyzer (Hitachi 747; Hitachi, Tokyo, Japan) at the central laboratory in the Taicang Centre for Disease Control and Prevention.

**References**

1. Chinese Medical Association SoN, Parkinson's Disease and Movement Disorders Study Group. Chinese expert consensus on research criteria for prodromal Parkinson's disease. *Chinese Journal of Geriatrics.* 2019;38(9):7.

2. Agachan F, Chen T, Pfeifer J, Reissman P, Wexner SD. A constipation scoring system to simplify evaluation and management of constipated patients. *Dis Colon Rectum.* 1996;39(6):681-685.

3. Stiasny-Kolster K, Mayer G, Schäfer S, Möller JC, Heinzel-Gutenbrunner M, Oertel WH. The REM sleep behavior disorder screening questionnaire—A new diagnostic instrument. *Movement Disorders.* 2007;22(16):2386-2393.

4. Wang Y, Wang ZW, Yang YC, Wu HJ, Zhao HY, Zhao ZX. Validation of the rapid eye movement sleep behavior disorder screening questionnaire in China. *Journal of clinical neuroscience : official journal of the Neurosurgical Society of Australasia.* 2015;22(9):1420-1424.

5. Radloff LS. The CES-D Scale: A Self-Report Depression Scale for Research in the General Population. *Applied Psychological Measurement.* 1977;1(3):385-401.

6. Jiang L, Wang Y, Zhang Y, et al. The Reliability and Validity of the Center for Epidemiologic Studies Depression Scale (CES-D) for Chinese University Students. *Front Psychiatry.* 2019;10:315.

7. Cao M, Wang N, Zheng P, Gu Z, Chan P. Validation of a new olfactory test for Chinese Parkinson's disease patients. *J Clin Neurosci.* 2020;76:31-35.

8. Sheng AY, Zhang YC, Sheng YJ, et al. Transcranial sonography image characteristics in different Parkinson's disease subtypes. *Neurological sciences : official journal of the Italian Neurological Society and of the Italian Society of Clinical Neurophysiology.* 2017;38(10):1805-1810.

9. Li K, Ge YL, Gu CC, et al. Substantia nigra echogenicity is associated with serum ferritin, gender and iron-related genes in Parkinson's disease. *Scientific reports.* 2020;10(1):8660.

10. Armstrong T, Bull F. Development of the World Health Organization Global Physical Activity Questionnaire (GPAQ). *Journal of Public Health.* 2006;14(2):66-70.

| **Supplementary Table S1.** Likelihood ratios of predictors for prodromal PD recommended by China and MDS | | | | | |
| --- | --- | --- | --- | --- | --- |
| Predictors | Recommended by China | |  | Recommended by MDS | |
| LR+ | LR- |  | LR+ | LR- |
| Male sex | 1.13 (M) | 0.87 (F) |  | 1.2 (M) | 0.8 (F) |
| Regular pesticide exposure | 2.03 | NA |  | 1.5 | NA |
| Use of tea/ nonuse of caffeine | 0.55 | 1.46 |  | 0.88* | 1.35* |
| Cigarette smoking |  |  |  |  |  |
| Current smoking | 0.65 | NA |  | NA | 0.45 |
| Former smoking | NA | 1.11 |  | NA | 0.8 |
| Never smoking | NA | 1.11 |  | 1.25 | NA |
| Current drinking | 0.76 | 1.06 |  | NA | NA |
| Family history of PD | 3.9 | 1 |  | 2.5 | NA |
| SN hyperechogenicity | 4.7 | 0.45 |  | 4.7 | 0.45 |
| RBD | 2.3 | 0.76 |  | 2.3 | 0.76 |
| Olfactory loss | 4 | 0.43 |  | 4 | 0.43 |
| Constipation | 2.2 | 0.8 |  | 2.2 | 0.8 |
| Depression | 1.8 | 0.85 |  | 1.8 | 0.85 |
| *nonuse of caffeine but not used of tea was used in calculation of prodromal PD recommended by MDS.  SN: substantial nigra; RBD: REM sleep behavior disorder; MDS: Movement Disorder Society; PD: Parkinson's disease. | | | | | |

| **Supplementary Table S2.** The variance of increased probability of prodromal PD contributed to each component of the PSQI | | | |
| --- | --- | --- | --- |
| Components of PSQI | R2 for different models* | | Difference in R2† |
| Covariates | Covariates + component |
| Recommended by China | | | |
| Subjective sleep quality | 0.193834 | 0.195457 | 0.001624 |
| Sleep latency | 0.193834 | 0.194224 | 0.000391 |
| Sleep duration | 0.193834 | 0.193947 | 0.000113 |
| Habitual sleep efficiency | 0.193834 | 0.193988 | 0.000154 |
| Sleep disturbances | 0.193834 | 0.193844 | 0.0000103 |
| Use of sleep medication | 0.193834 | 0.195211 | 0.001377 |
| Daytime dysfunction | 0.193834 | 0.19742 | 0.003587 |
| Recommended by MDS | | | |
| Subjective sleep quality | 0.190154 | 0.191778 | 0.001624 |
| Sleep latency | 0.190154 | 0.190606 | 0.000452 |
| Sleep duration | 0.190154 | 0.190195 | 0.0000411 |
| Habitual sleep efficiency | 0.190154 | 0.190298 | 0.000144 |
| Sleep disturbances | 0.190154 | 0.190185 | 0.0000308 |
| Use of sleep medication | 0.190154 | 0.191829 | 0.001675 |
| Daytime dysfunction | 0.190154 | 0.193515 | 0.003361 |
| *The logistic regression model was constructed with and without the component of the PSQI as the independent variable.  †The difference in R2 of the two models indicates the variance of increased probability of prodromal PD contributed to the corresponding component. | | | |

| **Supplementary Table S3.** The association between sleep quality and increased probability of prodromal PD in subgroups by sex, age, and education level | | |
| --- | --- | --- |
| Subgroups | OR (95%CI)* | |
| Recommended by China | Recommended by MDS |
| Sex |  |  |
| Males | 1.06 (1.03-1.10) | 1.07 (1.03-1.11) |
| Females | 1.04 (1.01-1.06) | 1.04 (1.01-1.06) |
| Age |  |  |
| <55 years | 1.07 (0.99-1.16) | 1.06 (0.98-1.15) |
| ≥55 years | 1.04 (1.02-1.06) | 1.04 (1.02-1.06) |
| Education level | |  |
| Less than high school | 1.04 (1.02-1.07) | 1.05 (1.03-1.07) |
| High school and above | 0.99 (0.90-1.09) | 0.99 (0.90-1.08) |
| *The logistic regression model was constructed with an increased probability of prodromal PD as the dependent variable and the PSQI score as the independent variable, adjusting for age, sex, education level, physical activity, body mass index, fast plasma glucose, high- and low-density lipoprotein cholesterol, and hypertension.  PSQI, Pittsburgh Sleep Quality Index; MDS: Movement Disorder Society; PD: Parkinson's disease. | | |

| **Supplementary Table S4.** The association between sleep quality and increased probability of prodromal PD after excluding participants with sleeping medication use | | |
| --- | --- | --- |
| Subgroups | OR (95%CI)* | |
| Recommended by China | Recommended by MDS |
| Free of sleep medications | 1.04 (1.01-1.06) | 1.04 (1.01-1.06) |
| *The logistic regression model was constructed with an increased probability of prodromal PD as the dependent variable and the PSQI score as the independent variable, adjusting for age, sex, education level, physical activity, body mass index, fast plasma glucose, high- and low-density lipoprotein cholesterol, and hypertension.  PSQI, Pittsburgh Sleep Quality Index; MDS: Movement Disorder Society; PD: Parkinson's disease. | | |
